# Supplementary material for: Exploiting the protein corona: coating of black phosphorus nanosheets enables macrophage polarization via calcium influx
Source: Royal Society of Chemistry journal article supplement (doi:10.1039/c9nr08570j), 2019-12-02
Supplement: c9nr08570j1.pdf [file c9nr08570j1.pdf]

## Supplementary Information

# Exploiting the protein corona: coating of black phosphorus nanosheets enables macrophage polarization via calcium influx

Jianbin Mo<sup>1, +</sup>, Yun Xu<sup>2, +</sup>, Xiuxiu Wang<sup>1, +</sup>, Wei Wei<sup>1, 2, 3, ★</sup> and Jing Zhao<sup>1, 3, ★</sup>

<sup>1</sup> State Key Laboratory of Coordination Chemistry, Institute of Chemistry and BioMedical Sciences, School of Chemistry and Chemical Engineering, Nanjing University, Nanjing, 210093, P. R. China

<sup>2</sup> State Key Laboratory of Pharmaceutical Biotechnology, School of Life Sciences, Nanjing University, Nanjing 210093, China.

<sup>3</sup> Shenzhen Research Institute, Nanjing University, Shenzhen, 518000, China.

★ E-mail: weiwei@nju.edu.cn, jingzhao@nju.edu.cn

### Experimental Section

**Material and cell lines.** The BP crystals were purchased from HWRK Chemical Co., Ltd. (Beijing, China), and stored in a N<sub>2</sub> glovebox. N-Methyl pyrrolidone (NMP) was purchased from Aladdin Chemistry Co., Ltd. (Shanghai, China). Mouse plasma from BALB/c mice was purchased from the Institute of Hematology, Chinese Academy of Medical Sciences. Mouse breast cancer cells (4T1), mouse melanoma cells (F10), mouse colon cancer cells (CT26) and mouse macrophages (Raw264.7) were purchased from the American Type Culture Collection (Manassas, VA). All the cell lines were not listed by the International Cell Line Authentication Committee as cross-contaminated or misidentified (v8.0, 2016). All of the cell lines were authenticated by STR typing and confirmed to be mycoplasma-free by KeyGEN BioTECH Co., Ltd. (Nanjing, China). All cells were cultured in RPMI 1640 or DMEM with 10% foetal bovine serum (FBS), 100 units/ml penicillin, and 50 units/ml streptomycin at 37 °C in a CO<sub>2</sub> incubator (95% relative humidity, 5% CO<sub>2</sub>).

**Preparation of BPNSs and BPCCs.** BPNSs were synthesized according to previous reports.<sup>1</sup> Briefly, 25 mg of BP powder was added to 25 ml of NMP and sonicated in ice bath for 48 h at a power of 600 W. The resulting brown suspension was centrifuged at 1800 g for 8 min to remove the residual unexfoliated particles, and the supernatant containing BPNSs was collected for further use.

For preparation of BPCCs, BPNSs were incubated with mouse plasma concentrations at 37 °C for 4 h. To obtain protein corona complexes, the mixed solution was centrifuged to pellet the particle-protein complexes. The precipitate was then resuspended three

times with 500 µl of PBS and centrifuged again for 20 min at 15000 g at 4 °C.

**Protein concentration.** 100 µl BPNSs were incubated with plasma at 37 °C for 4 h. Then, BPCCs were collected following the above method and resuspended in PBS. Protein concentration were detected and calculated according to BCA protein assay kit (Beyotime).

**Characterization of nanomaterials.** The morphology of BPNSs and BPCCs were determined by TEM (JEOL JEM-1200EX) and AFM (Bruker MultiMode 8). Energy dispersive X-ray spectroscopy was conducted on the TEM. The zeta potential of nanomaterials in PBS was measured on a Nano-ZS instrument (Malvern Instruments Limited). The size of the nanomaterials in PBS was detected with a DLS instrument (Brookhaven BI-200SM).

**LC-MS/MS analysis.** Raw264.7 cells were incubated with 15 µg/ml BPCCs for 24 h and treated with SDT buffer (4% SDS, 100 mM DTT, 150 mM Tris-HCl pH 8.0). The cell lysis solution was boiled for 15 min and then centrifuged at 14000 g for 20 min. Protein analysis (200 µg for same sample) was carried out following the FASP procedure reported by Mann et al.<sup>2</sup> Briefly, the detergents were removed by using 200 µl of UA buffer (8 M urea, 150 mM Tris-HCl pH 8.0) for ultrafiltration (Microcom units, 30 KD) by centrifugation. Then, iodoacetamide (0.05 M in UA buffer) was added to block reduced cysteine and incubated in the dark for 20 min. The filter was washed three times with 100 µl of UA buffer and then twice with 100 µl of 25 mM NH<sub>4</sub>HCO<sub>3</sub>. Finally, the protein suspension was digested with 3 µg of trypsin (Promega) in 40 µl of 25 mM NH<sub>4</sub>HCO<sub>3</sub> overnight at 37 °C, and the resulting peptides were collected as a filtrate. The peptide content was estimated by the UV light spectral density at 280 nm by using an extinction coefficient of 1.1 for a 0.1% (g/l) solution, calculated based on the frequency of tryptophan and tyrosine in vertebrate proteins. Each fraction was injected into a Q Exactive mass spectrometer (Thermo Scientific) for LC-MS/MS analysis. The detection method was positive ion, and the ion scanning range was 300-1800 m/z. The primary mass spectrometer resolution was 70,000 at 200 m/z, the automatic gain control (AGC) target was 1e6, the maximum IT was 50 ms, and the dynamic exclusion time was 60 s. The mass/charge ratio of the polypeptide and polypeptide fragments was collected as follows: 20 fragments were acquired after each full scan, the MS2 activation type was HCD, and the isolation window was 2 m/z. The rate was 17,500 at 200 m/z, normalized collision energy was 30 eV, and underfill was 0.1%. All identified proteins were retrieved from the UniProtKB mouse database (Release 2017\_02) in FASTA format. In this study, we used the label-free quantification algorithm for quantification. GO analysis was carried out with Blast2GO. KEGG pathway annotation on the target protein set was performed with KEGG Automatic Annotation Server (KAAS) software. Protein clustering was performed as follows: the quantitative information of the target protein collection was normalized, and then cluster 3.0 software was used to classify the two dimensions of sample and protein expression.

Finally, the hierarchical clustering heat map was generated using Java Trewview software. All experiments were repeated three times to ensure the reproducibility of the results.

For corona identification, the nanoparticle-protein complexes were lysed with lysis buffer. Total protein was reduced by adding 1 M DTT at 60 °C for 1 h, and free cysteines were alkylated with 1 M iodoacetamide at room temperature for 10 min in the dark. Then, trypsin was added to the treated protein (mass ratio=1:50), and the samples were incubated at 37°C for 20 h. Finally, the resulting peptides after digestion were collected by desalination (Zeba Spin Desalting Columns) and freeze-drying. Before LC-MS/MS analysis, the protein was redissolved in 0.1% formic acid, and then the samples were subjected to LC-MS/MS analysis with Q Exactive (Thermo Fisher) and Easy-nLC 1000 (Thermo Fisher). The identified proteins were retrieved from the UniProtKB database (Release 2017\_02) in FASTA format and then searched against the SwissPort database (mouse) using NCBI BLAST+ software (ncbi-blast-2.2.28+-win 32.exe) to search for homologous proteins for which the functional annotation can be transferred to the studied proteins. In this study, the top 10 blast hits with E-values less than 1e-3 for each query protein were retrieved and loaded into Blast2GO (Version 3.3.5) for GO mapping and annotation. The GO analysis was carried out according to a previous lecture.

**Morphological phenotyping analysis.** Raw264.7 cells were seeded into 2 cm culture dishes at a density of  $2 \times 10^5$  cells/ml for 24 h. Corona complexes were obtained as described above and resuspended in 1 ml DMEM media (0% FBS) to prepare for cell culture. Meanwhile, 15 µg of free BPNSs were resuspended in 1 ml of DMEM (0% FBS). In addition, Raw264.7 cells were stimulated with 20 ng/ml IL-4 (Abcam) or 100 ng/ml LPS (sigma) plus 20 ng/ml IFN- $\gamma$  (PeproTech) for 24 h to generate M2 macrophages or M1 macrophages, respectively. After treatment for 24 h at 37 °C, the medium was removed from the dish. After rinsing with PBS three times to remove the residual nanomaterials, the cells were immobilized with 1 ml of 4% paraformaldehyde for 15 min. Then, the cell nucleus and F-actin were stained with DAPI (KeyGEN BioTECH Co., Ltd, Nanjing, China) and phalloidin (Beyotime Biotechnology Co., Ltd, Shanghai, China), respectively; the cells were monitored using a fluorescence microscope (ZEISS).

**Flow cytometry analysis.** Raw264.7 cells were seeded into 6-well culture plates at a density of  $5 \times 10^5$  cells/ml for 24 h. After treated with BPNSs (15 µg/ml), BPCCs (15 µg/ml), IL-4 (20 ng/ml) and LPS (100 ng/ml) plus IFN- $\gamma$  (20 ng/ml) for 24 h, the cells were collected, washed and incubated with anti-CD80 antibody (Invitrogen) for 1 h. Then the cells were further washed, and analysed by flow cytometry (BD FACSCalibur).

**Ca<sup>2+</sup> signal measurement.** Macrophages were first treated with 15 µg/ml BPNSs or BPCCs for 24 h at 37 °C, and the cytosolic Ca<sup>2+</sup> concentration was determined with Fluo-4 AM (Beyotime Biotechnology Co., Ltd, Shanghai, China) according to the manufacturer's procedure. The Ca<sup>2+</sup> signals were detected by a microplate reader (Tecan Infinite M1000 PRO) and a fluorescence microscope.

(ZEISS).

To confirm the interaction between BPCCs and the STIM2 protein, 10  $\mu$ M BTP2 was added after the treatment of BPCCs. Then, the  $\text{Ca}^{2+}$  signals were measured with Fluo-4 AM by fluorescence microscopy (ZEISS).

**Quantitative RT-PCR.** The total RNA of Raw264.7 with or without treatment was extracted using an RNA Extraction Kits (OMEGA) according to the manufacturer's procedure. Then, 2  $\mu$ g of total RNA was used in a reverse transcription reaction with the Fasting RT Kit (TIANGEN Biotech Co., Ltd, Beijing, China). Quantitative RT-PCR was carried out with primers reported previously on the ABI StepOnePlus Real-Time PCR System (Applied Biosystems) using TB Green Premix Ex Taq (Takara).<sup>3-5</sup> mRNA expression levels were determined by the comparative Ct method.<sup>6</sup>

**Co-culture model.** To evaluate the chemotactic effects of BPCCs on macrophages, 4T1 cancer cells and Raw264.7 cells were co-cultured in Transwell systems with 3  $\mu$ m-sized microporous membranes (Corning), which allow macrophages to translocate across microporous membranes<sup>7</sup>. Macrophages ( $1.0 \times 10^6$  cells) were collected and pre-labelled with Dio (Beyotime Biotechnology Co., Ltd., Shanghai, China) following the manufacturers' procedure. Dio-labelled macrophages were plated onto Transwell inserts, and  $1.0 \times 10^6$  4T1 cancer cells were seeded into the bottom wells of the Transwell systems. Then, 15  $\mu$ g/ml BPNSs or BPCCs were added into the bottom chamber. Two types of cells were co-cultured with nanomaterials for 24 h at 37  $^{\circ}$ C. Then, the cells in the bottom chamber were rinsed with PBS twice. Dio-positive macrophages in the bottom chamber were detected and counted with a fluorescence microscope (Zeiss).

To evaluate the cytotoxicity of macrophages, different types of cancer cells and Raw264.7 cells were co-cultured in Transwell systems with 0.4  $\mu$ m-sized microporous membranes (Corning), which do not allow macrophages to migrate across the microporous membranes. Cancer cells were seeded into the bottom wells of the Transwell systems at  $8 \times 10^4$  cells/ml for 24 h, and Raw264.7 cells were simultaneously seeded into the insert chamber of the Transwell systems at  $1.6 \times 10^2$  cells/ml. Then, 15  $\mu$ g/ml nanomaterials were added into the insert or bottom chamber for 24 h at 37  $^{\circ}$ C. After that, the caspase 3/7 activity of the cancer cells in the bottom chamber was determined with a Caspase 3/7 Detection Kit (KeyGEN BioTECH Co., Ltd., Nanjing, China).

**Macrophage phagocytosis.** To visualize phagocytosis,  $1 \times 10^5$  4T1 cells were first plated into 2 cm culture dishes for 24 h and then labelled with DAPI (KeyGEN BioTECH Co., Ltd., Nanjing, China). Then,  $5 \times 10^5$  Dil-labelled (Beyotime Biotechnology Co., Ltd, Shanghai, China) macrophages and 15  $\mu$ g/ml BPCCs or BPNSs were added to the dishes, and the co-culture was incubated for an additional 24 h at 37  $^{\circ}$ C. Cells were fixed with 4% formaldehyde for 15 min, washed three times with PBS and analysed with a fluorescence microscope (ZEISS).

**Cytokine secretion assay.** To analyse cytokine secretion by Raw 264.7 cells, the cells were seeded into 96-well plates at  $1.0 \times 10^5$  cells/well for 24 h. BPNSs and BPCCs were resuspended in 1 ml of DMEM (0% FBS) and added into each well at different concentrations for 6 h. Cells incubated with plasma proteins were set as controls. Then, the supernatant was collected, and the cytokines were measured using an ELISA Kit (R&D Systems). In addition, the cytokine concentration in the culture medium from the co-culture model (described in the previous paragraph) was also measured by ELISA.

**Western blot analysis.** Raw264.7 cells were first treated with BPCCs or BPNSs for 24 h, and then the cell lysates were obtained with Whole Cell Lysis Assay (KeyGEN BioTECH Co., Ltd. Nanjing, China). The protein concentration was determined by the Super-Bradford Protein Assay Kit (CWBioTech, Inc., Beijing, China). The phosphorylation levels of MAPK members were determined by Western blot according to previous literature. Briefly, the extracts were first separated by 12% SDS-PAGE and transferred to a polyvinylidene difluoride membrane (Bio-Rad, CA, USA). The membrane was blocked with 5% BSA in TBST at 25 °C for 1 h and then incubated with antibodies at 4 °C overnight. The expression of  $\beta$ -actin was used as the internal standard. Primary antibodies against the following proteins were used:  $\beta$ -actin (13E5, 1:1000 for WB), p38 MAPK (8690, 1:1000 for WB), p-p38 MAPK (4511, 1:1000 for WB), p-Erk1/2 (4370, 1:1000 for WB), JNK (9252, 1:1000 for WB), p-JNK (4668, 1:1000 for WB) and Erk1/2 (4695, 1:1000 for WB) from CST. The appropriate secondary antibodies (1:1000 for WB) were purchased from CST.

**Immunofluorescence.** Raw264.7 cells were first treated with BPCCs or BPNSs for 24 h and then immobilized with 4% paraformaldehyde for 15 min. After washing three times with PBS, cells were permeabilized with PBS containing 0.2% Triton X-100 for 10 min. The cells were blocked with 1% BSA (Sigma) and 22.52 mg/ml glycine in PBST (PBS + 0.1% Tween-20) for 30 min and then incubated with antibodies at 4 °C overnight. Finally, the cell nucleus was stained with DAPI (Beyotime Biotechnology Co., Ltd.), and the cells were monitored using a fluorescence microscope (ZEISS). The primary antibody against NF- $\kappa$ B p65 (15095, 1:1000 for IF) and appropriate secondary antibodies (1:1000 for IF) were obtained from CST.

**Statistical analysis.** All the dates are expressed as the mean  $\pm$  standard deviation. Differences between different experimental groups were analysed by two-tailed Student's t test. One-way analysis of variance (ANOVA) was used in multiple group comparisons. Statistical analysis was performed using SPSS statistical program version 13 (SPSS Inc., Chicago, IL). Differences with  $P < 0.05$  (\*) or  $P < 0.01$  (\*\*) were considered statistically significant.

## Results

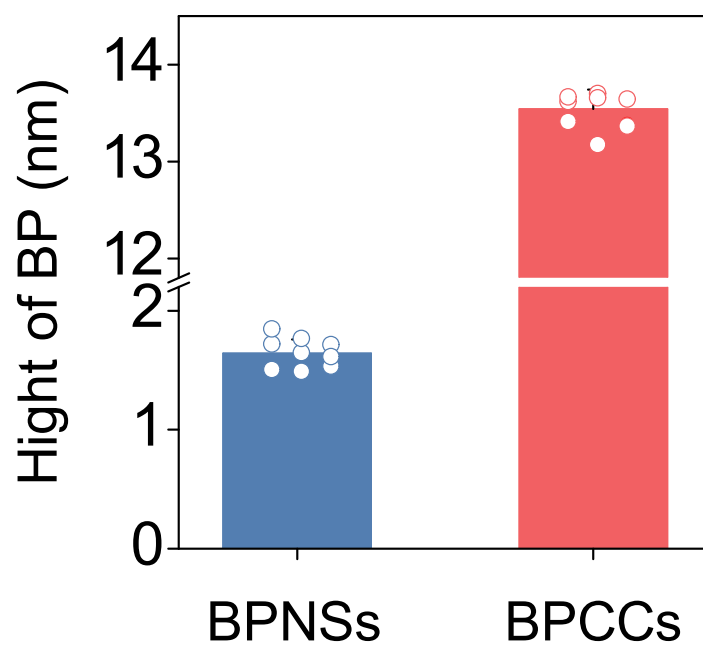

**Fig. S1** Statistical analysis of the height of 10 nanomaterials determined by AFM.

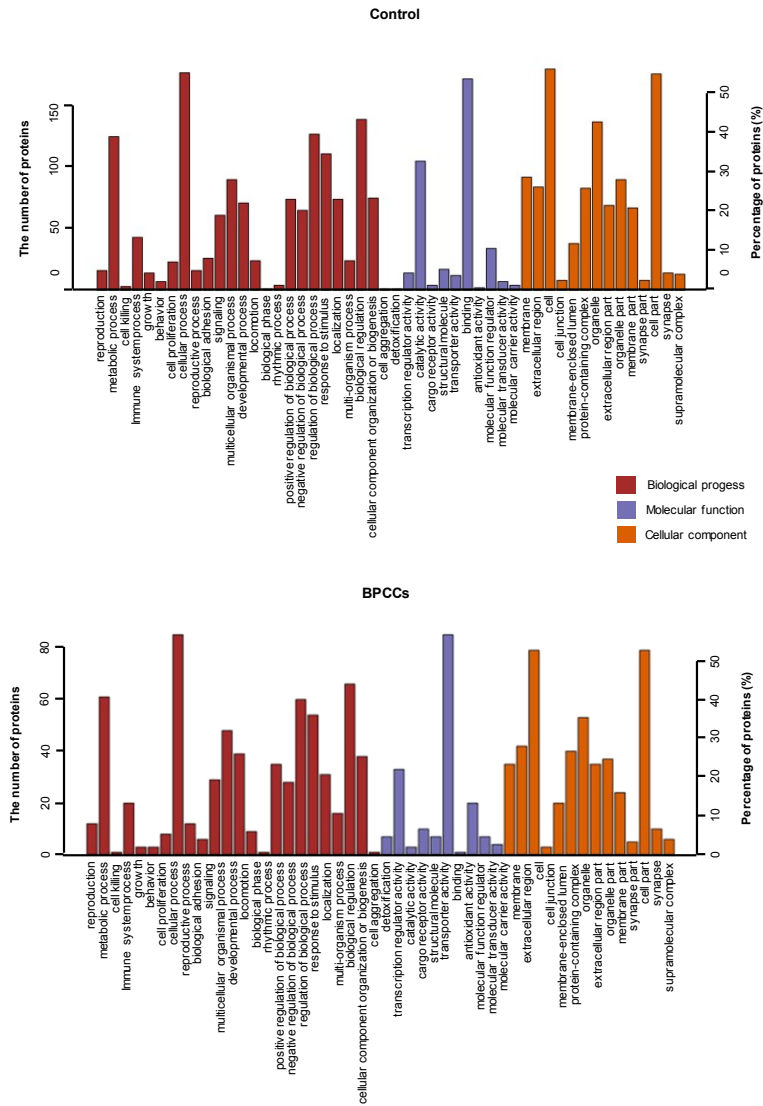

**Fig. S2** Gene ontology analysis of corona proteins classified according to their Biological Process, Molecular Function and Cellular Component, as analyzed by LC-MS/MS.

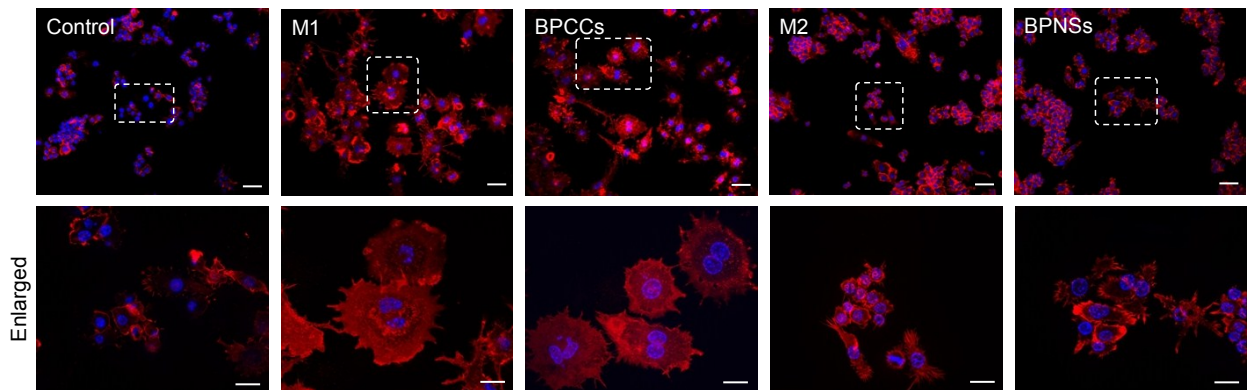

**Fig. S3** Morphological phenotyping analysis of Raw264.7 macrophages by fluorescence microscopy. Red, actin; blue, nucleus. Scale bars: (top) 20  $\mu$ m and (bottom) 50  $\mu$ m.

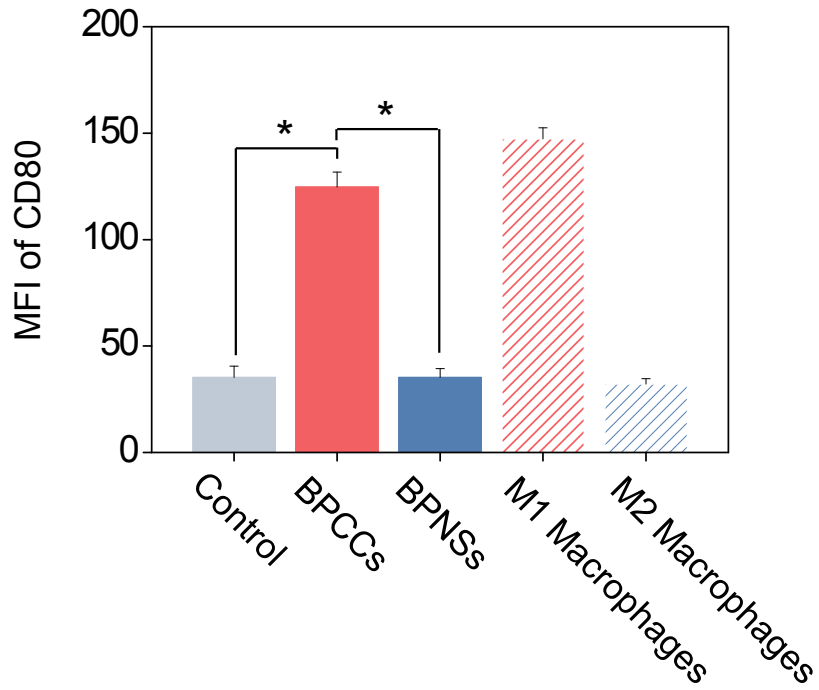

**Fig. S4** Flow cytometry analysis of CD80 expression on macrophages after 24 h treatment with nanomaterials. All values are expressed as the means  $\pm$  SDs of triplicates. Statistical significance is assessed by Student's t test. \* $p<0.05$ , \*\* $p<0.01$ .



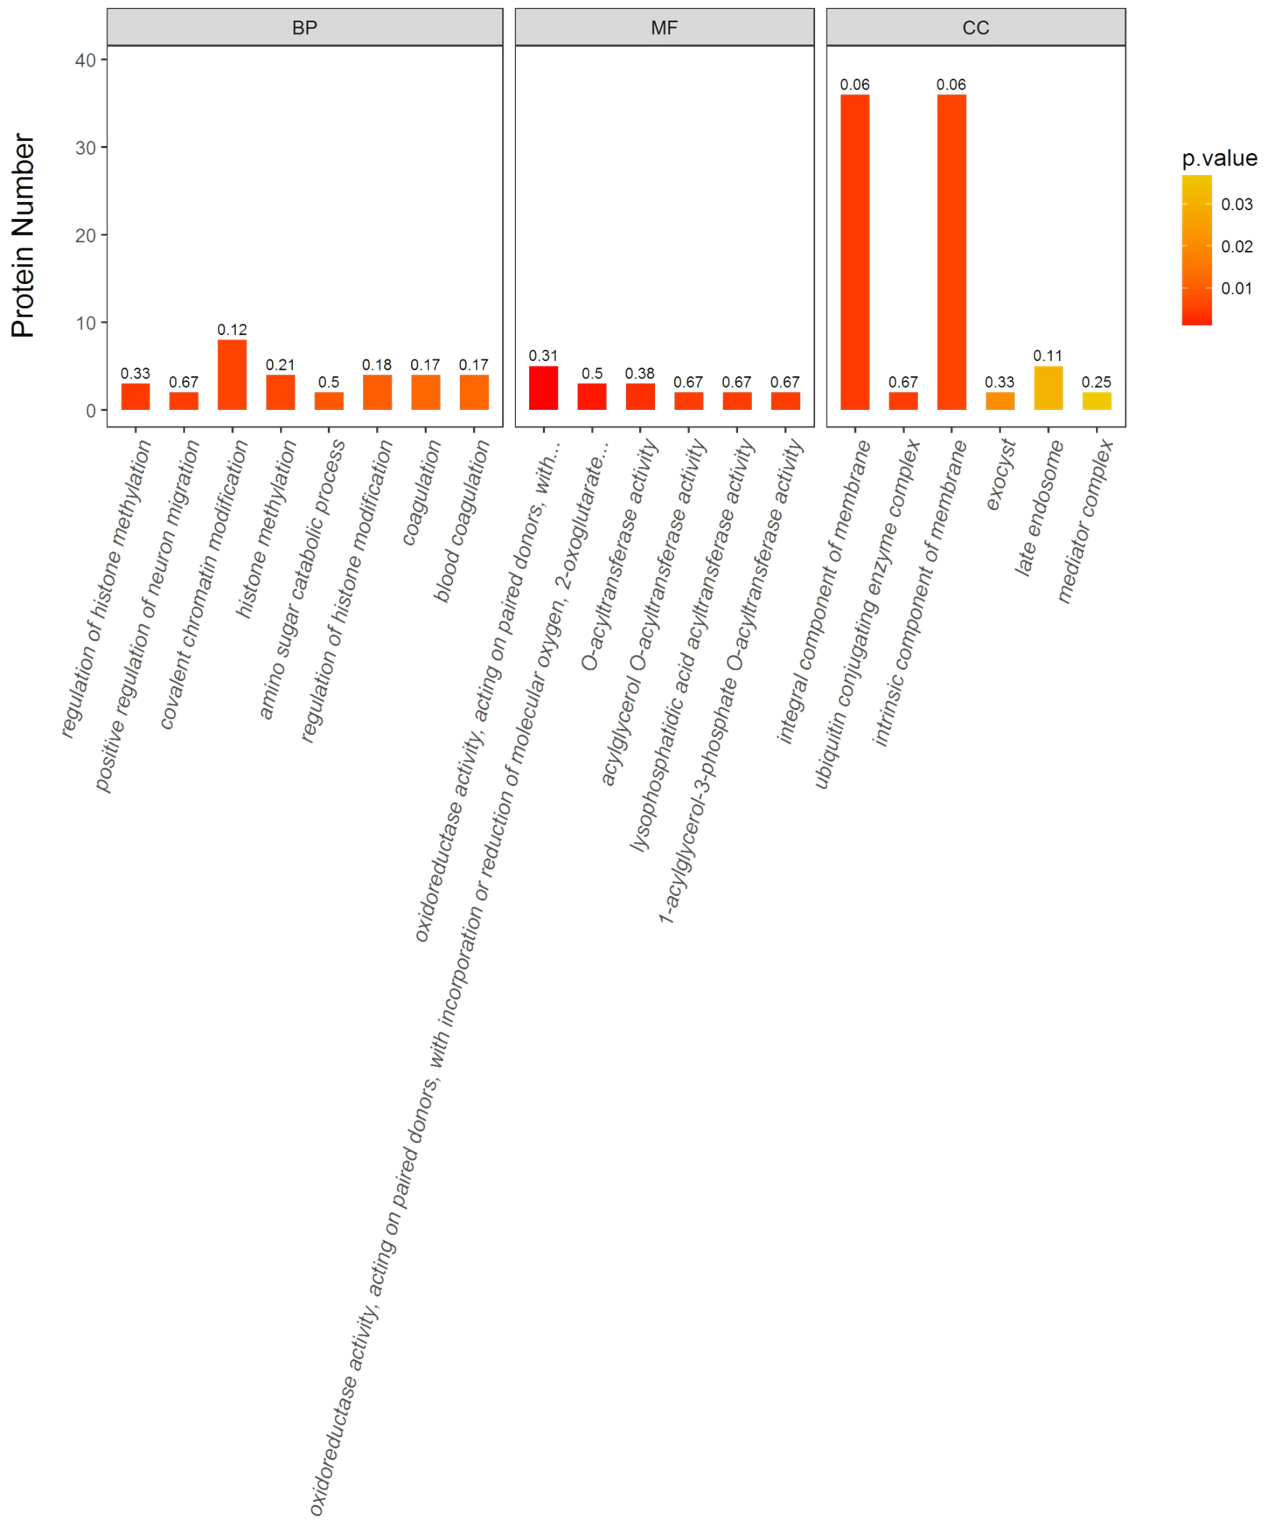

**Fig. S5** Gene ontology analysis of Proteins classified according to their Biological Process (BP), Molecular Function (MF) and Cellular Component (CC), as analyzed by LC-MS/MS.

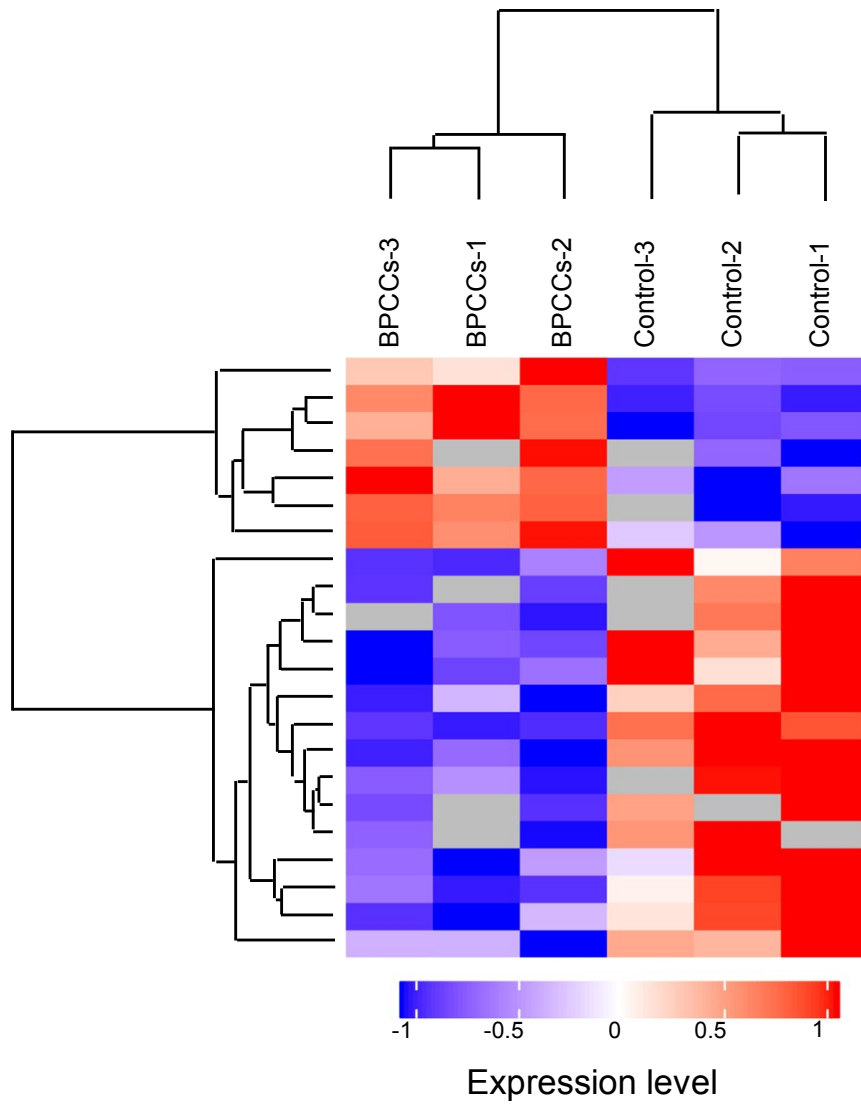

**Fig. S6** Heat maps of the 20 most significantly different proteins by label-free quantitative analysis ( $P < 0.05$ ).

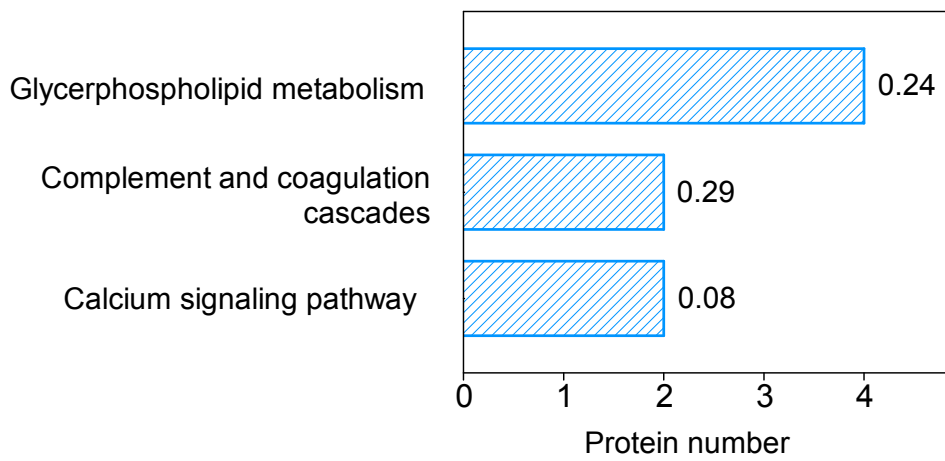

**Fig. S7** KEGG pathway database screening for specific pathways. Statistical significance was assessed by Student's test.

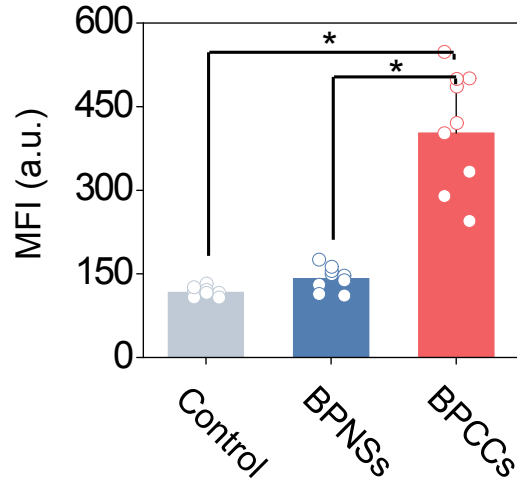

**Fig. S8** The MFI of Fluo-4 AM in macrophage cells detected by fluorescence microscopy. The cells were treated with 15  $\mu\text{g/ml}$  BPNSs or BPCCs for 12 h. All values are expressed as the mean  $\pm$  SD of triplicates. Statistical significance was assessed by Student's t test. \* $p < 0.05$ , \*\* $p < 0.01$ .

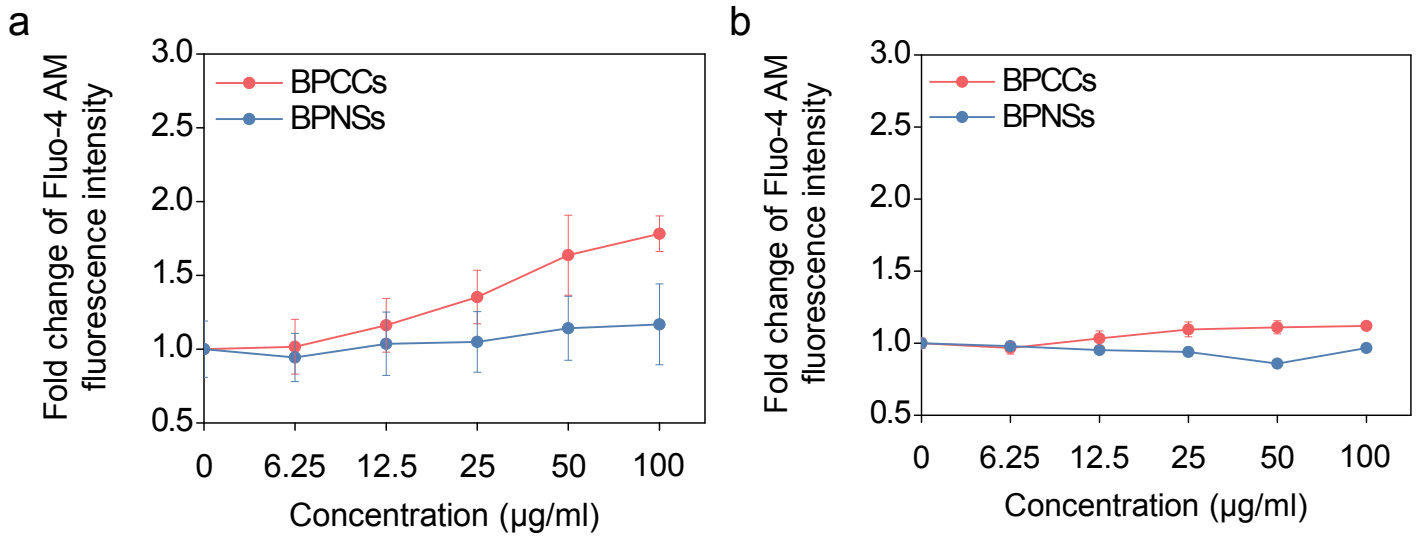

**Fig. S9** Fold Change of Fluo-4 AM fluorescence intensity elicited in the following conditions: (a)  $\text{Ca}^{2+}$ -contain culture medium and (b)  $\text{Ca}^{2+}$ -free culture medium. All values are expressed as the means  $\pm$  SDs of triplicates.

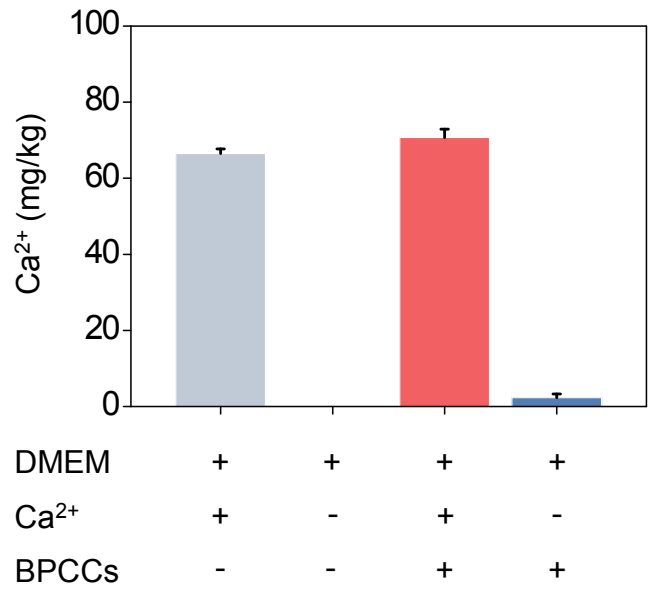

**Fig. S10** Detection of Ca<sup>2+</sup> concentration in different culture medium. All values are expressed as the means  $\pm$  SDs of triplicates. Statistical significance is assessed by Student's t test. \*p<0.05, \*\*p<0.01.

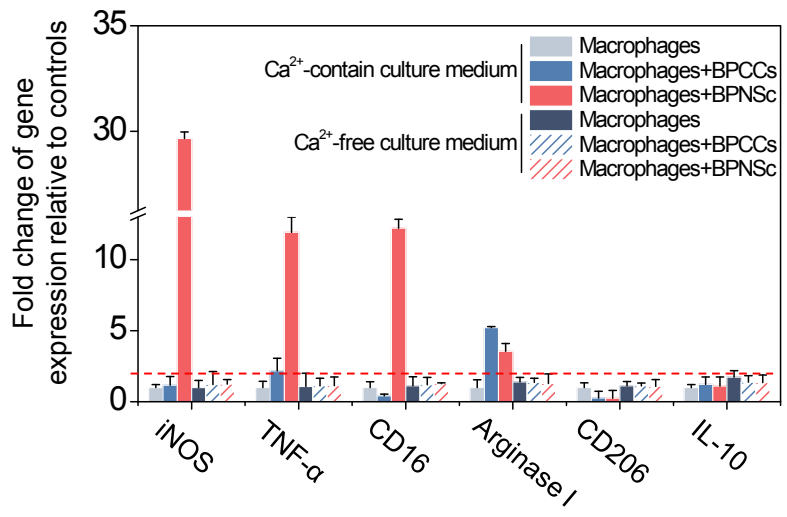

**Fig. S11** Mark genes of M1 or M2 macrophages were measured in Raw264.7 with or without nanomaterials treatment. Cells were cultured in Ca<sup>2+</sup>-contain culture medium and Ca<sup>2+</sup>-free culture medium.

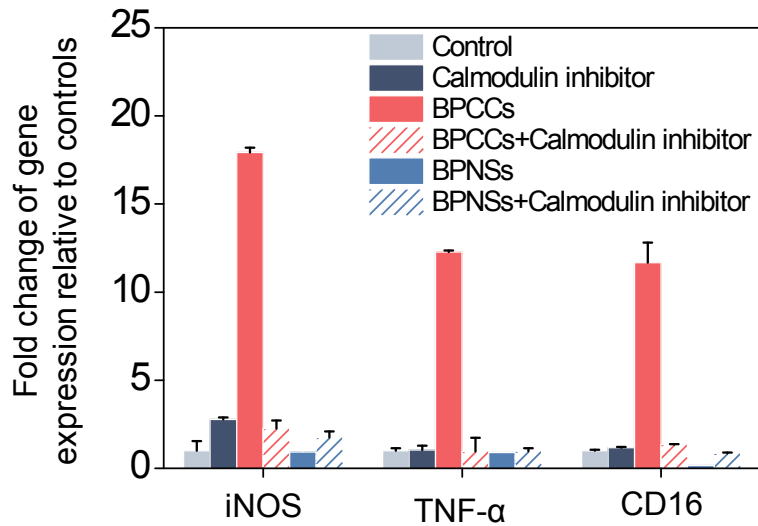

**Fig. S12** RT-PCR analysis of mark genes of M1 macrophages were measured in Raw264.7 with or without nanomaterials treatment. Cells were cultured in  $\text{Ca}^{2+}$ -contain culture medium and  $\text{Ca}^{2+}$ -free culture medium.

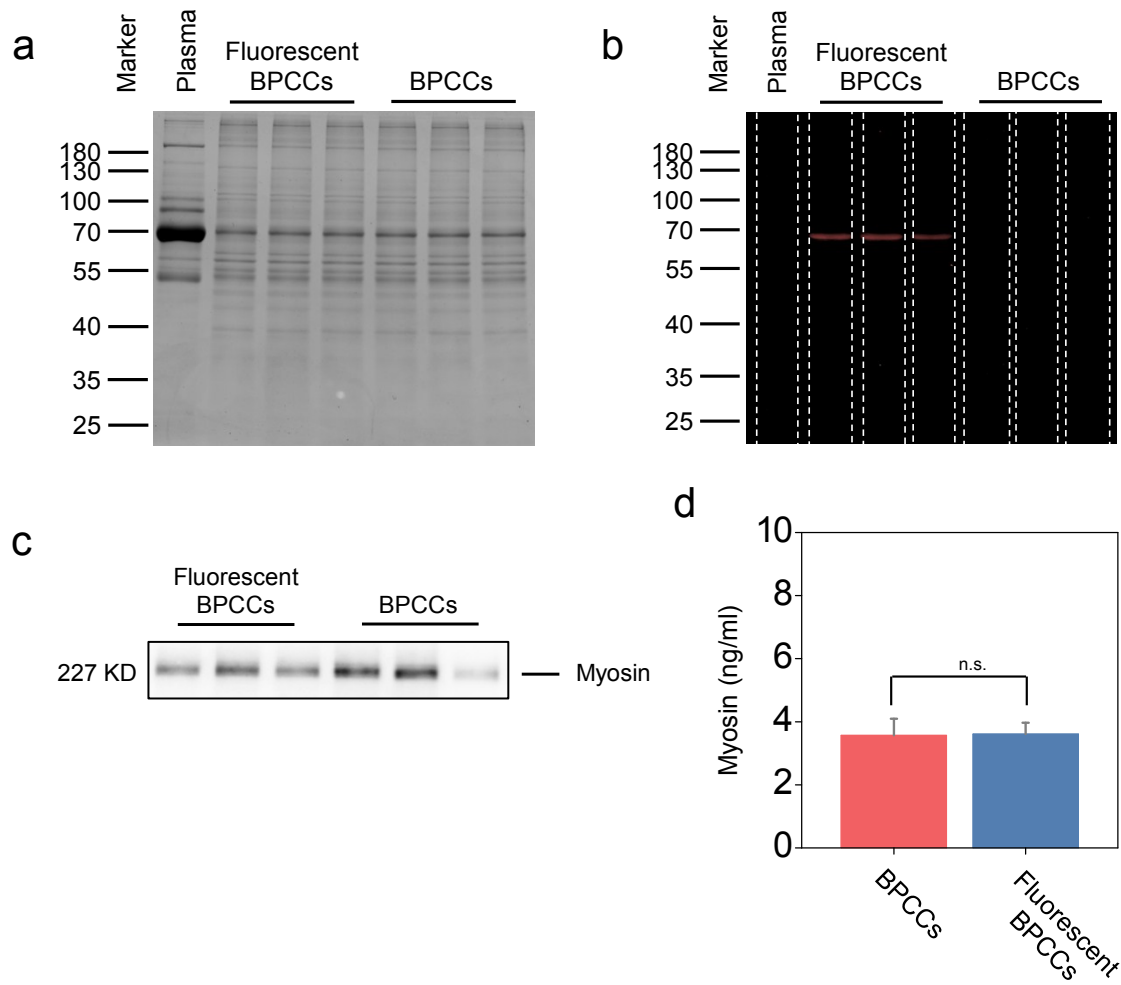

**Fig. S13** Analysis of fluorescent BPCCs. (a) SDS-PAGE analysis of BPCCs and fluorescent BPCCs. (b) . (c) Western blot analysis of myosin from BPCCs and fluorescent BPCCs. (d) ELISA analysis of myosin from BPCCs and fluorescent BPCCs. All values are expressed as the mean  $\pm$  SD of triplicates. Statistical significance was assessed by Student's t test. \* $p < 0.05$ , \*\* $p < 0.01$ .

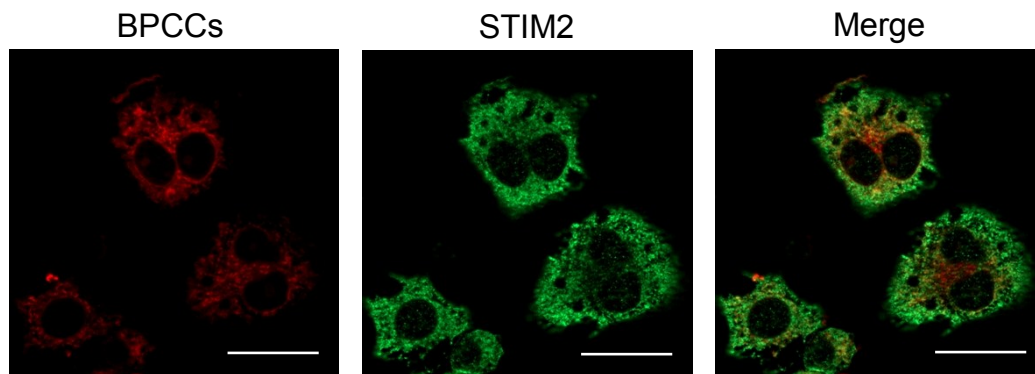

**Fig. S14** Cellular image of BPCCs and STIM2 location. Red, fluorescent BPCCs; Green, STIM2. Scale bar: 20  $\mu$ m. Fluorescent BPCCs were obtained by incubating BPNSs with plasma and SA-RBITC. The cells were treated with 15  $\mu$ g/ml fluorescent BPCCs for 12 h and visualized using fluorescence microscopy.

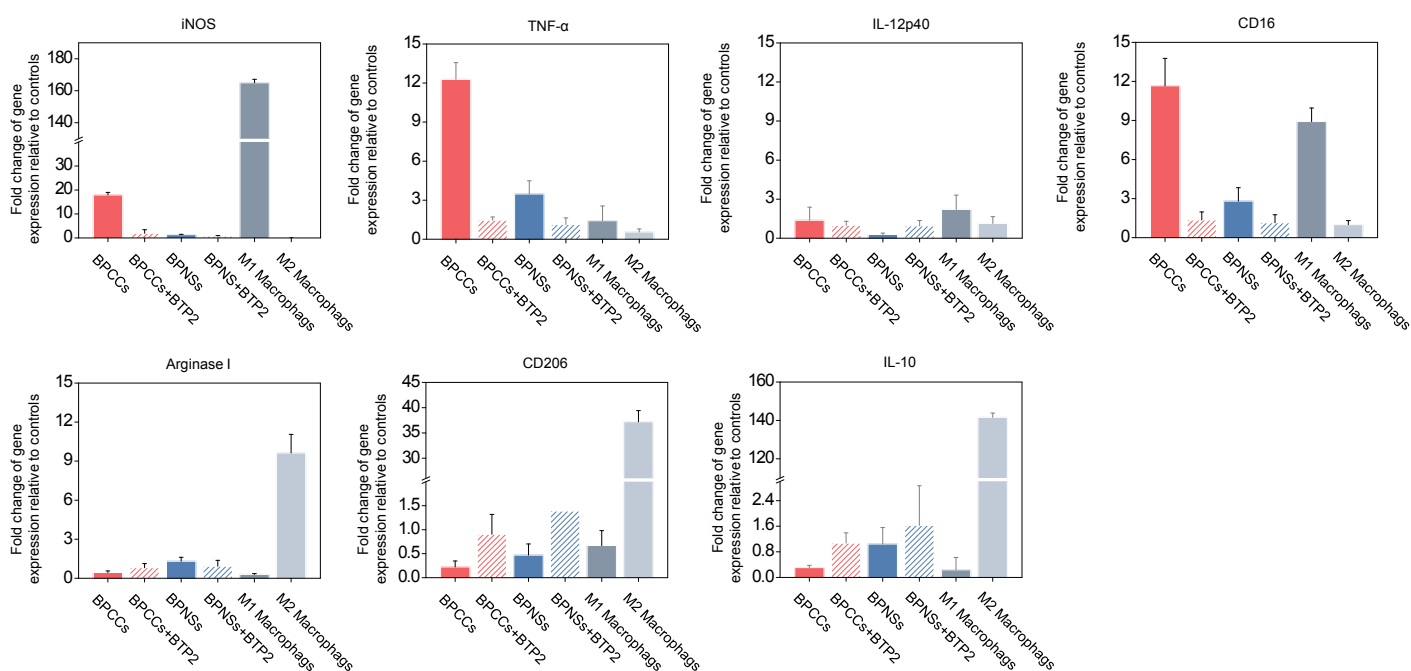

**Fig. S15** Mark genes of M1 or M2 macrophages were measured in Raw264.7 with or without nanomaterials treatment by quantitative RT-PCR.

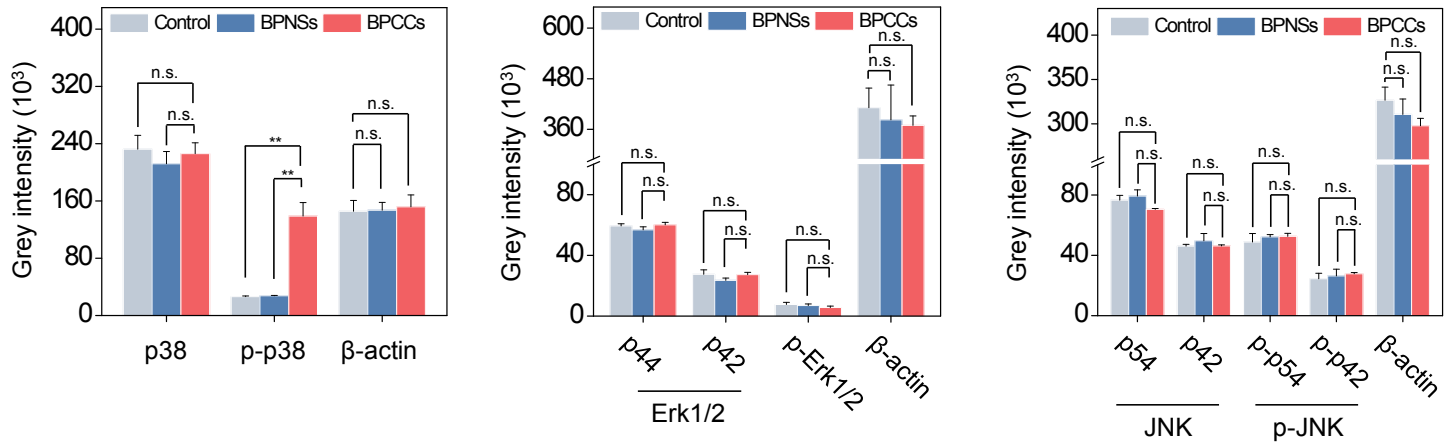

**Fig. S16** Quantitative analysis of western blots from Figure 4e.

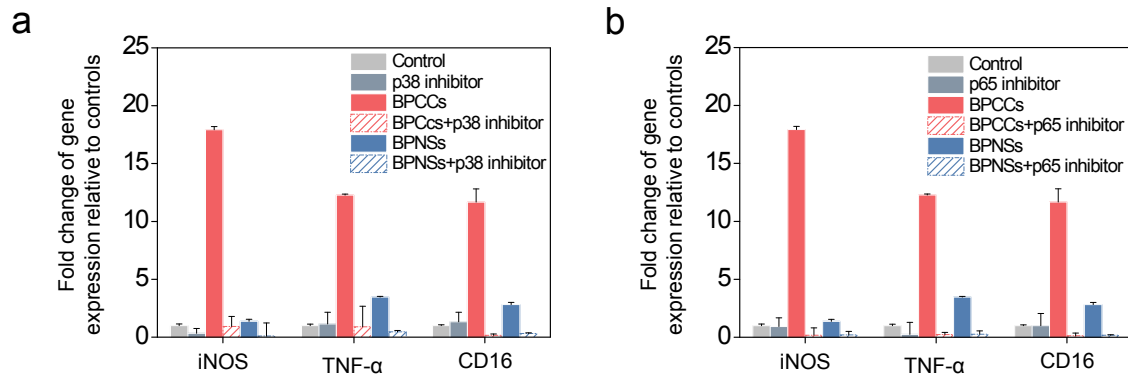

**Fig. S17** The mRNA levels of mark genes of M1 macrophages were analyzed by RT-PCR in Raw264.7 that had been pretreated with 10  $\mu$ M (a) MAPK p38 inhibitor or (b) NF- $\kappa$ B p65. All values are expressed as the means  $\pm$  SDs of triplicates.

**Table S1.** List of distinct proteins in Raw264.7 cells treated with BPCCs compared with un-treated cells by label-free quantitative proteomics analysis. Statistical significance was determined by Student's test.  $P < 0.05$ .

| Uniport accession number | Protein ID                                               | Unique PepCount | MolWeight | Average Lfq intensity of control group | Average Lfq intensity of BPCCs group | BPCCs/Control | p value     |
|--------------------------|----------------------------------------------------------|-----------------|-----------|----------------------------------------|--------------------------------------|---------------|-------------|
| Q5F2E7                   | Nuclear fragile X mental retardation-interacting protein | 6               | 75.656    | 312130333.3                            | 987870000                            | 3.164928      | 0.0153<br>1 |
| Q8K2T8                   | RNA polymerase II-associated factor 1 homolog            | 4               | 60.518    | 29436000                               | 73641500                             | 2.50175       | 0.0184<br>7 |

|                  |                                                                 |    |        |                 |                 |          |             |
|------------------|-----------------------------------------------------------------|----|--------|-----------------|-----------------|----------|-------------|
| A0A077S9N<br>161 | Lysozyme                                                        | 3  | 16.794 | 342450000       | 849100000       | 2.479486 | 0.0484<br>1 |
| F6VQ62H5         | Heterogeneous nuclear<br>ribonucleoprotein D-like<br>(Fragment) | 4  | 35.534 | 143912000       | 305590000       | 2.12345  | 0.0277<br>9 |
| Q9CQF639         | Prenylcysteine oxidase                                          | 2  | 56.466 | 30087000        | 63476666.6<br>7 | 2.109771 | 0.0005<br>9 |
| Q3U5U664         | Heme oxygenase                                                  | 12 | 30.197 | 3305700000      | 6848933333      | 2.071856 | 0.0014<br>2 |
| A5CVE465         | Stromal interaction molecule<br>2                               | 3  | 83.924 | 1233566667      | 2499600000      | 2.026319 | 0.0056<br>6 |
| Q8K4X766         | 1-acyl-sn-glycerol-3-<br>phosphate acyltransferase<br>delta     | 6  | 43.81  | 113933000       | 56537666.6<br>7 | 0.496236 | 0.0322<br>4 |
| Q5SV0267         | DNA repair protein RAD50                                        | 8  | 153.54 | 85520666.6<br>7 | 41908000        | 0.490034 | 0.0111<br>7 |
| Q91YX068         | Protein THEMIS2                                                 | 6  | 74.377 | 66237500        | 32447500        | 0.489866 | 0.0208<br>3 |
| Q8JZV769         | N-acetylglucosamine-6-<br>phosphate deacetylase                 | 8  | 43.5   | 454970000       | 198810000       | 0.436974 | 0.0481<br>1 |
| Q6116470         | Transcriptional repressor<br>CTCF                               | 7  | 68.349 | 44972000        | 19565000        | 0.435048 | 0.0187<br>8 |
| Q8BXZ1           | Protein disulfide-isomerase<br>TMX3                             | 8  | 51.847 | 747760000       | 319690000       | 0.42753  | 0.0011<br>4 |
| Q8VEB4           | Group XV phospholipase                                          | 2  | 47.307 | 61892333.3<br>3 | 26151666.6<br>7 | 0.422535 | 0.0024<br>8 |
| Q9D3B1           | Very-long-chain (3R)-3-<br>hydroxyacyl-CoA<br>dehydratase 2     | 2  | 28.402 | 72587000        | 30309666.6<br>7 | 0.417563 | 0.0425<br>5 |
| V9GXJ9           | Protein KRI1 homolog                                            | 5  | 68.631 | 111074666.<br>7 | 45552333.3<br>3 | 0.410106 | 0.0200<br>1 |
| Q91VC9           | Growth hormone-inducible<br>transmembrane protein               | 5  | 37.275 | 338633333.<br>3 | 132710666.<br>7 | 0.391901 | 0.0232<br>7 |
| B7ZC46           | Septin-8                                                        | 3  | 50.895 | 141160000       | 52817000        | 0.374164 | 0.0026<br>9 |
| E9Q0Z7           | Sulfatase-modifying factor 1                                    | 3  | 25.827 | 16919666.6<br>7 | 4962800         | 0.293315 | 0.0002<br>2 |
| Q9D0J4           | ADP-ribosylation factor-like<br>protein 2                       | 2  | 20.864 | 64941500        | 17813000        | 0.274293 | 0.0148<br>8 |

UniquePepCount: the total number of unique peptides associated with the protein group (i.e. these peptides are not shared with another protein group)



**Table S2.** Top 30 most abundant corona proteins on BPNSs.

| No | Protein ID                                   |                                             |                                                             |
|----|----------------------------------------------|---------------------------------------------|-------------------------------------------------------------|
|    | BPCCs-1                                      | BPCCs-2                                     | BPCCs-3                                                     |
| 1  | Complement C3                                | <b>Myosin-9</b>                             | <b>Myosin-9</b>                                             |
| 2  | Fibronectin                                  | <b>Myosin-11</b>                            | Actin, cytoplasmic 1                                        |
| 3  | <b>Myosin-9</b>                              | Uncharacterized protein                     | Complement C3                                               |
| 4  | Fibrinogen beta chain                        | Uncharacterized protein                     | Uncharacterized protein                                     |
| 5  | Inter-alpha trypsin inhibitor, heavy chain 2 | Complement C3                               | Filamin, alpha                                              |
| 6  | Apolipoprotein B-100 (Fragment)              | Uncharacterized protein                     | Fibrinogen beta chain                                       |
| 7  | Antithrombin                                 | Actin, aortic smooth muscle                 | Fibronectin                                                 |
| 8  | Heparin cofactor 2                           | Heat shock protein HSP 90-alpha             | Apolipoprotein B-100 (Fragment)                             |
| 9  | Ceruloplasmin                                | Antithrombin-III                            | Thrombospondin 1                                            |
| 10 | Inter-alpha-trypsin inhibitor heavy chain H1 | Moesin                                      | Complement C4-B                                             |
| 11 | Complement C5                                | Apolipoprotein B-100 (Fragment)             | Complement C5                                               |
| 12 | <b>Myosin-9</b>                              | Uncharacterized protein                     | Antithrombin                                                |
| 13 | Uncharacterized protein                      | Fibrinogen, B beta polypeptide, isoform CRA | Vitronectin                                                 |
| 14 | Gelsolin                                     | Heat shock protein HSP 90-beta              | Carboxypeptidase N catalytic chain                          |
| 15 | Prothrombin                                  | 14-3-3 protein zeta/delta (Fragment)        | Fibrinogen alpha chain                                      |
| 16 | Complement component 4B (Childo blood group) | MCG140959, isoform CRA                      | Gelsolin                                                    |
| 17 | Predicted gene 20547 (Fragment)              | Vitronectin                                 | UTP--glucose-1-phosphate uridylyltransferase                |
| 18 | Plasminogen                                  | Transthyretin                               | Inter-alpha trypsin inhibitor, heavy chain 2                |
| 19 | Albumin 1                                    | Carboxypeptidase N catalytic chain          | Proteasome subunit alpha type                               |
| 20 | Serotransferrin                              | Chondroadherin                              | Serine (Or cysteine) peptidase inhibitor, clade D, member 1 |
| 21 | Fibrinogen gamma chain                       | Calpain small subunit 1                     | Coagulation factor V                                        |
| 22 | Pregnancy zone protein                       | Talin-2                                     | Heat shock protein HSP 90-alpha                             |
| 23 | Alpha-2-macroglobulin-P                      | Titin                                       | Alpha-actinin-1                                             |
| 24 | Inter-alpha-trypsin inhibitor heavy chain H3 | Eno3 protein                                | MCG140959, isoform CRA                                      |

|    |                                                |                                              |                         |
|----|------------------------------------------------|----------------------------------------------|-------------------------|
| 25 | Proteasome subunit alpha type-6                | Complement C4-B                              | Heat shock protein 84b  |
| 26 | Coagulation factor X                           | <b>Myosin regulatory light polypeptide 9</b> | Pregnancy zone protein  |
| 27 | Haptoglobin                                    | Uncharacterized protein                      | Alpha-2-macroglobulin-P |
| 28 | Serum paraoxonase/arylesterase 1<br>(Fragment) | <b>Myosin-7</b>                              | Uncharacterized protein |
| 29 | Transthyretin                                  | Filamin, alpha                               | Vinculin                |
| 30 | Vitronectin                                    | Uncharacterized protein                      | Transthyretin           |

All experiments were conducted twice to ensure the reproducibility of the results.

### References:

1. J. Mo, Q. Xie, W. Wei and J. Zhao, *Nat. Commun.*, 2018, **9**, 2480.
2. J. Wisniewski, A. Zougman, N. Nagaraj and M. Mann, *Nat. Methods*, 2009, **6**, 359-362.
3. K. A. Kigerl, J. C. Gensel, D. P. Ankeny, J. K. Alexander, D. J. Donnelly and P. G. Popovich, *The Journal of Neuroscience*, 2009, **29**, 13435.
4. S. Scarfi, M. Magnone, C. Ferraris, M. Pozzolini, F. Benvenuto, U. Benatti and M. Giovine, *Respiratory Research*, 2009, **10**, 25.
5. B. Deng, S. A. Villalta, J. G. Tidball, B. Fedor, C. Rinaldi and G. Liu, *Human Molecular Genetics*, 2010, **20**, 790-805.
6. Q. Shi, A. T. Nguyen, Y. Angell, D. Deng, C. R. Na, K. Burgess, D. D. Roberts, F. C. Brunnicardi and N. S. Templeton, *Gene Therapy*, 2010, **17**, 1085.
7. S. Zanganeh, G. Hutter, R. Spitler, O. Lenkov, M. Mahmoudi, A. Shaw, J. S. Pajarinen, H. Nejadnik, S. Goodman, M. Moseley, L. M. Coussens and H. E. Daldrop-Link, *Nat. Nanotechnol.*, 2016, **11**, 986.
